# Supplementary material for: Choice and Partnership Approach to community mental health and addiction services: a realist-informed scoping review
Source: HighWire-hosted journal article supplement (doi:10.1136/bmjopen-2022-064436), 2022-10-01
Supplement: bmjopen-2022-064436supp001_data_supplement.pdf [file bmjopen-2022-064436supp001_data_supplement.pdf]

## Supplementary File 1: Search Strategies

The search strategies for all databases are as follow:

### MEDLINE (Ovid)

| # | Searches                                                                                   | Results |
|---|--------------------------------------------------------------------------------------------|---------|
| 1 | ("choice and partnership*" adj2 (approach* or model? or program? or programme?)).ti,ab,kf. | 10      |
| 2 | (CAPA and (approach* or model? or program? or programme?)).ti,ab,kf.                       | 138     |
| 3 | 1 or 2                                                                                     | 139     |
| 4 | limit 3 to yr="2005 -Current"                                                              | 124     |

### Embase (Elsevier)

| No. | Query                                                                                                    | Results |
|-----|----------------------------------------------------------------------------------------------------------|---------|
| #1  | ('choice and partnership*' NEAR/2 (approach* OR model\$ OR program\$ OR programme\$)):ti,ab,kw           | 15      |
| #2  | capa:ti,ab,kw AND (approach*:ti,ab,kw OR model\$:ti,ab,kw OR program\$:ti,ab,kw OR programme\$:ti,ab,kw) | 214     |
| #3  | #1 OR #2                                                                                                 | 215     |
| #4  | (#1 OR #2) AND [2005-2022]/py                                                                            | 196     |

### CINAHL (EBSCO)

| #  | Query                                                                                                                                                                          | Limiters/Expanders                                                                                                                          | Results |
|----|--------------------------------------------------------------------------------------------------------------------------------------------------------------------------------|---------------------------------------------------------------------------------------------------------------------------------------------|---------|
| S1 | TI ( ("choice and partnership*" N2 (approach* or model# or program# or programme#) ) OR AB ( ("choice and partnership*" N2 (approach* or model# or program# or programme#) ) ) | Expanders - Apply related words; Apply equivalent subjects<br>Search modes - Boolean/Phrase                                                 | 11      |
| S2 | TI ( (CAPA and (approach* or model# or program# or programme#) ) OR AB ( (CAPA and (approach* or model# or program# or programme#) ) )                                         | Expanders - Apply related words; Apply equivalent subjects<br>Search modes - Boolean/Phrase                                                 | 65      |
| S3 | S1 OR S2                                                                                                                                                                       | Expanders - Apply related words; Apply equivalent subjects<br>Search modes - Boolean/Phrase                                                 | 67      |
| S4 | S1 OR S2                                                                                                                                                                       | Limiters - Published Date: 20050101-20221231<br>Expanders - Apply related words; Apply equivalent subjects<br>Search modes - Boolean/Phrase | 59      |

## PsycINFO (EBSCO)

| #  | Query                                                                                                                                                                          | Limiters/Expanders                                                                                                                          | Results |
|----|--------------------------------------------------------------------------------------------------------------------------------------------------------------------------------|---------------------------------------------------------------------------------------------------------------------------------------------|---------|
| S1 | TI ( ("choice and partnership*" N2 (approach* or model# or program# or programme#) ) OR AB ( ("choice and partnership*" N2 (approach* or model# or program# or programme#) ) ) | Expanders - Apply related words; Apply equivalent subjects<br>Search modes - Boolean/Phrase                                                 | 7       |
| S2 | TI ( (CAPA and (approach* or model# or program# or programme#) ) OR AB ( (CAPA and (approach* or model# or program# or programme#) ) )                                         | Expanders - Apply related words; Apply equivalent subjects<br>Search modes - Boolean/Phrase                                                 | 49      |
| S3 | S1 OR S2                                                                                                                                                                       | Expanders - Apply related words; Apply equivalent subjects<br>Search modes - Boolean/Phrase                                                 | 49      |
| S4 | S1 OR S2                                                                                                                                                                       | Limiters - Published Date: 20050101-20221231<br>Expanders - Apply related words; Apply equivalent subjects<br>Search modes - Boolean/Phrase | 41      |

## Scopus (Elsevier)

| History Count | Search Terms                                                                                                                                                                         | Results              |
|---------------|--------------------------------------------------------------------------------------------------------------------------------------------------------------------------------------|----------------------|
| 1             | TITLE-ABS-KEY ( "choice and partnership*" W/2 ( approach* OR model* OR program* ) )                                                                                                  | 14 document results  |
| 2             | TITLE-ABS-KEY ( capa AND ( approach* OR model* OR program* ) )                                                                                                                       | 639 document results |
| 3             | ( TITLE-ABS-KEY ( "choice and partnership*" W/2 ( approach* OR model* OR program* ) ) ) OR ( TITLE-ABS-KEY ( capa AND ( approach* OR model* OR program* ) ) )                        | 641 document results |
| 4             | ( TITLE-ABS-KEY ( "choice and partnership*" W/2 ( approach* OR model* OR program* ) ) ) OR ( TITLE-ABS-KEY ( capa AND ( approach* OR model* OR program* ) ) ) AND ( PUBYEAR > 2004 ) | 533 document results |

## Google (Grey Literature)

| History Count | Search Terms                                                                                                                           | Results              |
|---------------|----------------------------------------------------------------------------------------------------------------------------------------|----------------------|
| 1             | ("choice and partnership" AND (approach OR model OR program OR programme)) OR ("CAPA" AND (approach OR model OR program OR programme)) | About 30,100 results |
| 2             | "choice and partnership approach"                                                                                                      | About 21,400 results |
