# Supplementary material for: Choice and Partnership Approach to community mental health and addiction services: a realist-informed scoping review
Source: HighWire-hosted journal article supplement (doi:10.1136/bmjopen-2022-064436), 2022-10-01
Supplement: bmjopen-2022-064436supp003_data_supplement.pdf [file bmjopen-2022-064436supp003_data_supplement.pdf]

**Supplementary File 3: Characteristics of Included Records**

| REPORT ID                                                         | COUNTRY     | RECORD TYPE               | DESIGN       | NUMBER/TYPE OF PARTICIPANTS, DATA                                                                                                                               |
|-------------------------------------------------------------------|-------------|---------------------------|--------------|-----------------------------------------------------------------------------------------------------------------------------------------------------------------|
| Clark et al. 2018 <sup>13,a</sup>                                 | Canada      | Journal article           | Pre-post     | 154 pre-, 794 post-CAPA client records (wait times)<br>81 youth, 125 parent ESQ surveys                                                                         |
| Wilson et al. 2015 <sup>35</sup>                                  | Scotland    | Journal article           | Descriptive  | 2896 patient records (appointments)                                                                                                                             |
| Naughton et al. 2018 <sup>14,b</sup>                              | Australia   | Journal article           | Pre-post     | 33 pre-, 77 post-CAPA clients (Diagnoses and outcomes)                                                                                                          |
| Naughton et al. 2015 <sup>68,b</sup>                              | Australia   | Journal article           | Pre-post     | 134 pre-, 338 post-CAPA client records (wait times)<br>Clinician, manager meeting notes                                                                         |
| Fuggle et al. <sup>36</sup> 2016                                  | England     | Journal article           | Pre-post     | 92 pre-, 66 post-CAPA client outcomes<br>Clinician focus group                                                                                                  |
| Robotham et al. 2010 <sup>15,c</sup>                              | England     | Journal article           | Descriptive  | Phase I: 114 CAMHS teams<br>Phase II: 53 CAMHS teams<br>Phase IIIa: 6 CAMHS teams<br>Phase IIIb: 62 clinicians and staff (Implementation and staff experiences) |
| York and Wilson 2012 <sup>64,d</sup>                              | New Zealand | Abstract                  | Not reported | Administrative data (wait times), families' satisfaction                                                                                                        |
| Hong et al. 2014 <sup>69</sup>                                    | Australia   | Abstracts                 | Descriptive  | Administrative data (wait times)                                                                                                                                |
| Clark et al. 2012 <sup>58,a</sup>                                 | Canada      | Report                    | Pre-post     | 114 clinicians, 218 parents/caregivers post CAPA<br>Administrative data (wait times)                                                                            |
| Chugg 2009 <sup>37</sup>                                          | England     | Journal article           | Not reported | Administrative data (waiting lists)                                                                                                                             |
| Department for Children, School and Families 2009 <sup>38,g</sup> | England     | Policy/practice guideline | Not reported | Administrative data (wait times)                                                                                                                                |
| Taylor and Duffy 2010 <sup>39</sup>                               | Scotland    | Journal article           | Descriptive  | 133 families (satisfaction)                                                                                                                                     |
| Abidi 2014 <sup>59,a</sup>                                        | Canada      | Presentation              | Not reported | Administrative data (wait times)                                                                                                                                |
| Curtis et al. 2010 <sup>40</sup>                                  | England     | Report                    | Descriptive  | Administrative data (capacity and demand, wait times)                                                                                                           |
| Quintana 2017 <sup>16</sup>                                       | Canada      | Thesis                    | Other        | Administrative (HR resources, numbers of session, wait times)                                                                                                   |

|                                                  |                                        |                 |                     |                                                                                                                                                                                                                                |
|--------------------------------------------------|----------------------------------------|-----------------|---------------------|--------------------------------------------------------------------------------------------------------------------------------------------------------------------------------------------------------------------------------|
| Perry et al. 2014 <sup>41</sup>                  | England                                | Presentation    | Descriptive         | Administrative data (capacity and demand)                                                                                                                                                                                      |
| Murphy et al. (n.d.) <sup>60</sup>               | Canada                                 | Presentation    | Pre-post            | Administrative data (waits times, no shows, flow, appointments)<br>Satisfaction, team feedback                                                                                                                                 |
| Falconer and Milnes 2016 <sup>65,d</sup>         | New Zealand                            | Presentation    | Descriptive         | 52 clients<br>Implementation, wait times                                                                                                                                                                                       |
| Robotham 2009 <sup>17,c</sup>                    | England                                | Report          | Descriptive         | Questionnaires:<br>Phase 1a: 213 clinicians, staff<br>Phase 1b: 53 CAMHS teams<br>Phase 1c: 7 CAMHS teams<br>Phase 2: 7 parents, 7 children/youth<br>Focus groups/Interviews:<br>Phase 2: 6 CAMHS teams, 3 parents, 6 children |
| Gardner et al. (n.d.) <sup>61,a</sup>            | Canada                                 | Presentation    | Pre-post            | 1521 Administrative data (wait times, referrals)                                                                                                                                                                               |
| Boyd and Wilson 2016 <sup>42</sup>               | Scotland                               | Report          | Descriptive         | Administrative data (wait times)                                                                                                                                                                                               |
| Black (n.d.) <sup>66,e</sup>                     | New Zealand                            | Presentation    | Descriptive         | 52 children/families<br>Clinician, staff feedback                                                                                                                                                                              |
| York and Kingsbury 2010(b) <sup>28,c,d,e,h</sup> | Australia, New Zealand, United Kingdom | Presentation    | Summary of research | Administrative data (wait times, capacity and demand, referrals)<br>Client/ family feedback (survey, interview)<br>Clinician, staff feedback<br>Referrer feedback                                                              |
| Cooney et al. 2019 <sup>34</sup>                 | Scotland                               | Journal article | Descriptive         | 106 clients'/ family's administrative data (wait times, flow)                                                                                                                                                                  |
| Brown et al. 2021 <sup>62,f</sup>                | Canada                                 | Report          | Descriptive         | 116 surveys with clinicians, staff<br>50 interviews with clinicians, staff, and clients<br>3 focus groups with 14 service providers                                                                                            |
| Jones 2012 <sup>43</sup>                         | England                                | Dissertation    | Pre-post            | Administrative data (wait times, attendance, referrals, flow)<br>Clinician, staff feedback                                                                                                                                     |
| Kingsbury and York 2006 <sup>30,e,h</sup>        | England                                | Web report      | Descriptive         | Client feedback from 100 families<br>Focus group with clinician, staff                                                                                                                                                         |
| Kingsbury and York 2008 <sup>44,e</sup>          | England                                | Web report      | Descriptive         | 48 client/ family feedback                                                                                                                                                                                                     |
| Kingsbury and York 2007 <sup>71,e</sup>          | Not reported                           | Web report      | Descriptive         | 113 clinicians and managers<br>Administrative data (wait times)                                                                                                                                                                |

|                                                  |                                        |                 |                       |                                                                                          |
|--------------------------------------------------|----------------------------------------|-----------------|-----------------------|------------------------------------------------------------------------------------------|
| Stockbridge and Thompson 2007 <sup>45,e</sup>    | England                                | Web report      | Pre-post              | Administrative data (wait times)<br>Client/ family satisfaction                          |
| Jenkin 2006 <sup>31,e</sup>                      | Scotland                               | Presentation    | Pre-post              | Administrative data (wait times)<br>Clinician, staff feedback<br>Referrer feedback       |
| Chaloub 2009 <sup>46,e</sup>                     | England                                | Presentation    | Pre-post              | Administrative data (wait times, flow)<br>Clinician, staff feedback (3 teams)            |
| Greaney 2009 <sup>67,e</sup>                     | New Zealand                            | Presentation    | Descriptive           | Focus groups with 53 clients<br>Youth and youth consumer advisor feedback                |
| Barnes 2009 <sup>47,e</sup>                      | England                                | Presentation    | Pre-post              | Administrative data (wait times)<br>Family feedback<br>Referrer feedback                 |
| Burhouse 2006 <sup>48,e</sup>                    | England                                | Web report      | Not reported          | Administrative data (wait times)<br>Client/ family feedback<br>Clinician, staff feedback |
| Botros 2009 <sup>49,e</sup>                      | England                                | Presentation    | Descriptive           | 43 client/ family feedback                                                               |
| Thorpe 2010 <sup>50,e</sup>                      | England                                | Presentation    | Descriptive           | 132 client/ family feedback                                                              |
| Kingsbury 2006 <sup>32,e,h</sup>                 | England                                | Web report      | Descriptive           | ESQ, Choice questionnaire (families)<br>Focus group with clinicians                      |
| Fell 2010 <sup>51,e</sup>                        | England                                | Presentation    | Not reported          | Administrative data (wait times)<br>17 clinicians' feedback                              |
| Stapley 2007 <sup>52,e</sup>                     | England                                | Presentation    | Not reported          | Clients                                                                                  |
| Splevins 2007 <sup>53,e,g</sup>                  | England                                | Web report      | Descriptive           | Clients                                                                                  |
| Unknown 2008 <sup>54,e</sup>                     | England                                | Web report      | Descriptive           | Administrative data (wait times)<br>Clinician, staff feedback                            |
| York and Kingsbury 2010(a) <sup>28,c,d,e,h</sup> | Australia, New Zealand, United Kingdom | Presentation    | Summary of research   | Administrative data (wait times)<br>Clinician, staff feedback                            |
| Clark and Pajer 2016 <sup>63,a</sup>             | Canada                                 | Presentation    | Descriptive, pre-post | Administrative data (wait times)<br>Client satisfaction                                  |
| Fitzpatrick and Wynn 2016 <sup>55</sup>          | Wales                                  | Web report      | Descriptive           | Administrative data (wait times)<br>CAPA Fidelity (CAPA Component Rating Scale)          |
| Johnstone et al. 2022 <sup>33,f</sup>            | Canada                                 | Journal article | Descriptive           | 50 interviews (clinicians), focus groups, online survey (115 participants)               |
| Trafford Council (n.d.) <sup>56</sup>            | England                                | Report/plan     | Descriptive           | Administrative data                                                                      |

|                            |         |                 |             |                     |
|----------------------------|---------|-----------------|-------------|---------------------|
| Jones 2011 <sup>57,i</sup> | England | Journal article | Descriptive | Administrative data |
|----------------------------|---------|-----------------|-------------|---------------------|

<sup>a</sup> Clark et al. 2018, Clark et al. 2012, Abidi 2014, Gardner et al. 2016, and Clark and Pajer 2016 include information from the same evaluation.

<sup>b</sup> Naughton et al. 2018 and Naughton et al. 2015 stem from the same evaluation.

<sup>c</sup> Robotham et al. 2010 and Robotham 2009 stem from the same evaluation and both are captured in both York and Kingsbury 2010(a) and York and Kingsbury 2010(b)

<sup>d</sup> York and Wilson 2012 and Falconer and Milnes 2016 stem from the same evaluation and are both captured in both York and Kingsbury 2010(a) and York and Kingsbury 2010(b)

<sup>e</sup> Black (n.d.), Kingsbury and York 2006, Kingsbury and York 2008, Kingsbury and York 2007, Stockbridge and Thompson 2007, Jenkin 2006, Chaloub 2009, Greaney 2009, Barnes 2009, Burhouse 2006, Botros 2009, Thorpe 2010, Kingsbury 2006, Fell 2010, Stapley 2007, Splevins 2007, Unknown 2008, are captured in both York and Kingsbury 2010(a) and York and Kingsbury 2010(b)

<sup>f</sup> Johnstone et al. 2022 includes information reported in Brown 2021

<sup>g</sup> Splevins 2007 is reported as one of the case studies in Department of Children, Schools and Families 2009.

<sup>h</sup> Kingsbury and York 2006 and Kingsbury 2006 report some of the same data and both are captured in both York and Kingsbury 2010(a) and York and Kingsbury 2010(b)

<sup>i</sup> Jones 2011 stems from the Curtis et al. 2010 evaluation.
